# Supplementary material for: Identification of Functional Toxin/Immunity Genes Linked to Contact-Dependent Growth Inhibition (CDI) and Rearrangement Hotspot (Rhs) Systems
Source: PubMed Central journal article supplement (PMC3150448; doi:10.1371/journal.pgen.1002217), 2011-08-04
Supplement: pgen.1002217.s003.pdf [file pgen.1002217.s003.pdf]

2272 . . . D E Q R N H T G T K K G L V S S T T A  
*cdiA* CATGACGAGCAGCGCAATCATACCGGGACTAAAAAAGGGCTGGTCTCCAGCACCACCGCC

*CTo3* AAATGAGATCCAGGCTCTACACTGGGATCTGCCAAAGGGCTGGTCTCCAGCACCACCAACC

2292 R S E E G R S Q T L A V G S M L S A G S  
*cdiA* CGCAGCGAAGAGGGCCGGAGCCAGACGCTGGCGGTGGGCTCGATGCTCTCGGCGGGTTCC

*CTo3* CGCAGCGAGGAGGGCCGGAGCCAGACGCTGGCGGTGGGCTCGATGCTCTCGGCGGGTTCC

2312 I D V S S Q N I A V A G S S V V A D K D  
*cdiA* ATTGATGTCAGTAGCCAAAATATCGCGGTGCGCCGGCAGCAGCGTGGTGGCCGATAAGGAT

*CTo3* ATTGATGTCAGTAGCCAAAATATCGCGGTGCGCGGCAGCAGCGTGGTGGCCGATAAGGAT

2332 I R L R A Q E N L T V S T A Q Q S E S G  
*cdiA* ATTGCGCTGCGTGCGCAGGAAAACCTGACCGTGAGCACCGCGCAGCAGAGCGAGAGCGGG

*CTo3* ATTGCGCTGCGTGCGCAGGAAAACCTGACCGTGAGCACCGCGCAGCAGAGCGAGAGCGGG

2352 S Q L F E Q K K S G L M S T G G I G V F  
*cdiA* TCTCAGCTATTTCGAGCAGAAAAATCCGGCCTGATGAGCACCGGCGGTATCGGTGTCTTT

*CTo3* TCTCAGCTATTTCGAGCAGAAAAATCCGGCCTGATGAGCACCGGCGGTATCGGTGTCTTT

2372 I G T S R Q K T T D Q T Q T V S H I G S  
*cdiA* ATCGGGACTTCCCGGCAGAAAACCACCGACCAGACCCAAACGGTGAGCCATATTGGCAGC

*CTo3* ATCGGGACTTCCCGGCAGAAAACCACCGACCAGACCCAAACGGTGAGCCATATTGGCAGC

2392 T V G S L T G N V R L E A G N Q L A L H  
*cdiA* ACGGTGGGCAGCCTGACGGGCAATGTGCGTCTCGAGGCGGGCAATCAGTTAGCCCTCAC

*CTo3* ACGGTGGGCAGCCTGACGGGCAATGTGCGTCTCGAGGCGGGCGATCAGTTAGCCCTCAC

2412 G S D V V A G K D L A L T G A D V A I S  
*cdiA* GGCAGCGACGTGGTGGCGGGTAAAGACCTCGCCCTGACAGGGGCGGATGTCGCGATCAGC

*CTo3* GGCAGCGACGTGGTGGCGGGTAAAGACCTCGCCCTGACAGGGGCGGATGTCGCGATCAGC

2432 A A E N S R S Q Q Y T A E S K Q S G L T  
*cdiA* GCCGCAGAAAATAGCCGTTCTCAACAGTATACTGCCGAGAGTAAACAAAGTGGCCTGACG

*CTo3* GCCGCAGAAAATAGCCGTTCTCAACAGTATACTGCCGAGAGTAAACAAAGTGGCCTGACG

2452 V A L S G P V G S A V N T A V T T A K A  
*cdiA* GTGGCGCTGTCCGGACCGGTCGGCAGTGCCGTCAATACGGCGGTACCACCGCCAAAGCG

*CTo3* GTGGCGCTGTCCGGACCGGTCGGCAGTGCCGTCAATACGGCGGTACCACCGCCAAAGCG

2472 A R E E N T G R L A G L Q G V K A A L S  
*cdiA* GCCCGCGAAGAAAACACCGGCCGGCTGGCGGGATTGCAAGGGGTCAAAGCGGCGCTGTCC

*CTo3* GCCCGCGAAGAAAACACCGGCCGGCTGGCGGGATTGCAAGGGGTCAAAGCGGCGCTGTCC

2492 G V Q A V Q A G Q L V Q A Q G G G V T E  
*cdiA* GGGGTGCAAGCGGTGCAGGCCGGCAACTGGTGCAGGCCAGGGAGGCGGAGTCACTGAG  
*CTo3* GGGGTGCAGGCGGTGCAGGCCGGCAACTGGTGCAGGCCAGGGAGGTGGTGTCTGCTGAG

2512 M V G V S V S L G S Q K S S S Q Q Q Q E  
*cdiA* ATGGTGGGCGTCACTGTGTCTGTTAGGCTCACAGAAATCGTCCTCGCAGCAACAGCAGGAA  
*CTo3* ATGGTGGGCGTCACTGTGTCTGTTAGGCTCACAAAATCGTCCTCGCAGCAACAGCAGGAA

2532 Q T Q V S G S A L T A G N N L S I K A T  
*cdiA* CAGACCCAGGTGAGCGGTTCGGCCCTGACGGCGGGTAATAACCTGAGCATCAAGGCCACC  
*CTo2* ...ACTTAAAACTAGTATTAAAGATCC  
*CTo3* CAGACCCAGGTGAGCGGTTCGGCCCTGACGGCGGGTAATAACCTGAGCATCAAGGCCACC

2552 G G G N A A N S G D I L I A G S Q L K A  
*cdiA* GGTGGCGGGAATGCGGCAAACAGCGCGATATTCTGATCGCTGGCAGCCAGCTTAAAGCC  
*CTo2* CAGCTTCACTCTGGGATCAACCGGTAAGCGATATTCTGATCGCCGGCAGCCAGCTTAAAGCC  
*CTo3* GGTGGCGGGAATGCGGCAAACAGCGCGATATTCTGATCGCTGGCAGCCAGCTTAAAGCC

2572 G G D T R L D A A R D V R L L G A A N R  
*cdiA* GGGGGCGATACCCGGCTTGATGCGGGCGGTGACGTGCGGTTACTCGGGCGCGGCAATAGG  
*CTo2* GGGGGCGATACCCGGCTTGATGCGGGCGGTGACGTGCGGTTACTCGGGCGCGGCAATAGG  
*CTo3* GGGGGCGATACCCGGCTTGATGCGGGCGGTGACGTGCGGTTACTCGGGCGCGGCAATAGG

2592 Q K T D G S N S S R G G S V G V S V G G  
*cdiA* CAAAAAACCGACGGCAGTAACAGCAGCCGTGGCGGTAGCGTTGGCGTCAGTGTGGGGGGC  
*CTo2* CAAAAAACCGACGGCAGTAACAGCAGCCGTGGCGGTAGCGTTGGCGTCAGTGTGGGGGGC  
*CTo3* CAAAAAACCGACGGCAGTAACAGCAGCCGTGGCGGTAGCGTTGGCGTCAGTGTGGGGGGC

2612 S G L S V F A N A N K G Q G N E R G D G  
*cdiA* AGCGGTCTGAGCGTCTTTGCCAATGCCAACAAGGGGCAGGGCAATGAGCGCGGTGACGGC  
*CTo2* AGCGGTCTGAGCGTCTTTGCCAATGCCAACAAGGGGCAGGGCAATGAGCGCGGTGACGGC  
*CTo3* AGCGGTCTGAGCGTCTTTGCCAATGCCAACAAGGGGCAGGGCAATGAGCGCGGTGACGGC

2632 T F W T E T T V D S G G M F S L R S G R  
*cdiA* ACTTTCTGGACGGAACCACCGTCGACAGTGGCGGAATGTTCTCGTTGCGCAGTGGCCCGC  
*CTo2* ACTTTCTGGACGGAACCACCGTCGACAGTGGCGGAATGTTCTCGTTGCGCAGTGGCCCGC  
*CTo3* ACTTTCTGGACGGAACCACCGTCGACAGTGGCGGAATGTTCTCGTTGCGCAGTGGCCCGC

2652 D T A L T G A Q V S A E T V K A D V G R  
*cdiA* GATACGGCACTGACCGGCGCGCAGGTGAGCGCTGAAACGGTCAAGGCCGATGTGGGGCGT  
*CTo2* GATACGGCACTGACCGGCGCGCAGGTGAGCGCTGAAACGGTCAAGGCCGATGTGGGGCGT  
*CTo3* GATACGGCACTGACCGGCGCGCAGGTGAGCGCTGAAACGGTCAAGGCCGATGTGGGGCGT  
*CTo4* ...TCC

2672 N L T L Q S Q Q D R D N Y D A K Q S R V  
*cdiA* AATCTTACTCTGCAAAGCCAGCAGGACCGCGATAATTATGATGCGAAGCAGAGCCGTGTC  
*CTo2* AATCTTACTCTGCAAAGCCAGCAGGACCGCGATAATTATGATGCGAAGCAGAGCCATGTC  
*CTo3* AATCTTACTCTGCAAAGCCAGCAGGACCGCGATAATTATGATGCGAAGCAGAGCCGTGC  
*CTo4* TAGTTAGTTGGTGGGGCTTTTGCTTTTACATATTTTATGACGCGAAGCAGAGCCATGTC

2692 S G G I S V P V A G G G A A V N L S M S  
*cdiA* AGCGGCGGTATCAGTGTCCCGGTGGCGGGGGGGCGGTGCCGCGGTCAACCTGAGCATGAGC  
*CTo2* AGCGGCGGTATCAGTGTCCCGGTGGCGGGGGGGCGGTGCCGCGGTCAACCTGAGCATGAGC  
*CTo3* AGCGGCGGTATCAGTGTCCCGGTGGCGGGGGGGCGGTGCCGCGGTCAACCTGAGCATGAGC  
*CTo4* AGCGGCGGTATCAGTGTCCCGGTGGCGGGGGGGCGGTGCCGCGGTCAACCTGAGCATGAGC

2712 D R L S S Q Y D S V Q A Q T G I F A G  
*cdiA* CGTGACAGGTTATCCAGCCAGTATGATTCGGTGCAGGCGCAGACGGGTATTTTTGCCGGC  
*CTo2* CGTGACAGGTTATCCAGCCAGTATGATTCGGTGCAGGCGCAGACGGGTATTTTTGCCGGC  
*CTo3* CGTGACAGGCTATCCAGCCAGTATGACTCGGTGCAGGCGCAGACGGGTATTTTTGCCGGT  
*CTo4* CGTGACAGGTTATCCAGCCAGTATGATTCGGTGCAGGCGCAGACGGGTATTTTTGCCGGC

2732 S G G V D I R V G E H T Q L D G A V I A  
*cdiA* TCTGGCGGTGTTGATATCCGGTGGGGGAGCACACCCAAGTGGATGGCGCGGTGATTGCC  
*CTo2* TCTGGCGGTGTTGATATCCGGTGGGGTGGAGCACACCCAAGTGGATGGCGCGGTGATTGCC  
*CTo3* TCTGGCGGTGTTGATATCCGGTGGGGGAGCACACCCAAGTGGATGGCGCGGTGATTGCC  
*CTo4* TCTGGCGGTGTTGATATCCGGTGGGGGAGCACACCCAAGTGGATGGCGCGGTGATTGCC

2752 S T A A A D K N T L D T G T L G F S D I  
*cdiA* AGCACGGCGGCAGCCGATAAAAAACACGCTGGATACCGGCACACTGGGCTTCAGTGATATC  
*CTo2* AGCACGGCGGCAGCCGATAAAAAACACGCTGGATACCGGCACACTGGGCTTCAGTGATATC  
*CTo3* AGCACGGCGGCAGCCGATAAAAAACACGCTGGATACCGGCACACTGGGCTTCAGTGATATC  
*CTo4* AGCACGGCGGCAGCCGATAAAAAACACGCTGGATACCGGCACACTGGGCTTCAGTGATATC

2772 K N K A V F T V E H Q G G S L S T G G P  
*cdiA* AAAAAAAGCGGTATTCACGGTAGAGCATCAGGGCGGCAGCCTGAGCACCGGTGGCCCG  
*CTo2* AAAAAAAGCGGTATTCACGGTAGAGCATCAGGGCGGCAGCCTGAGCACCGGTGGCCCG  
*CTo3* AAAAAAAGCGGTATTCACGGTAGAGCATCAGGGCGGCAGCCTGAGCACCGGTGGCCCG  
*CTo4* AAAAAAAGCGGTATTCACGGTAGAGCATCAGGGCGGCAGCCTGAGCACCGGTGGCCCG

2792 V G S D L L S N L G G M V L A G L G N G  
*cdiA* GTGGGTCAGACCTGCTGAGTAATCTGGGCGGTATGGTGCTCGCGGGGCTGGGCAATGGC  
*CTo2* GTGGGTCAGACCTGCTGAGTAATCTGGGCGGCATGGTGCTCGCGGGGCTGGGCAATGGC  
*CTo3* GTGGGTCAGACCTGCTGAGTAATCTGGGCGGCATGGTGCTCGCGGGGCTGGGCAATGGC  
*CTo4* GTGGGTCAGACCTGCTGAGTAATCTGGGTCGCATGGTGCTCGCGGGGCTGGGCAATGGC

2812 G Y A E G T T Q A A V S E G T I T V R D  
*cdiA* GGATATGCCGAAGGCACCACGCAGGCGGCAGTGAAGTGAAGGCACGATTACCGTTCGCGAC  
*CTo2* GGATATGCTGAAGGCACCACGCAGGCGGCAGTGAAGTGAAGGCACGATTACCGTTCGCGAC  
*CTo3* GGATATGCCGAAGGCACCACGCAGGCGGCAGTGAAGTGAAGGCACGATTACCGTTCGCGAC  
*CTo4* GGATATGCCGAAGGCACCACGCAGGCGGCAGTGAAGTGAAGGCACGATTACCGTTCGCGAC

2832 T E N Q Q Q N V D D L S R D T G N A N G  
*cdiA* ACGGAGAATCAACAGCAGAAATGTTGATGACCTGAGCCGGGACACCGGGAATGCCAACGGC  
*CTo2* ACGGAGAATCAACAGCAGAAATGTTGATGACCTGAGCCGGGACACCGGGAATGCCAACGGC  
*CTo3* ACGGAGAATCAACAGCAGAAATGTTGATGACCTGAGCCGGGACACCGGGAATGCCAACGGC  
*CTo4* ACGGAGAATCAACAGCAGAAATGTTGATGACCTGAGCCGGGACACCGGGAATGCCAACGGC

2852 S I G P I F D K E K E Q N R L K E V Q L  
*cdiA* AGTATCGGGCCGATTTTTGATAAAGAGAAAGAGCAGAACCGGCTGAAAGAAGTGCAGCTG  
*CTo2* AGTATCGGGCCGATTTTTGATAAAGAGAAAGAGCAGAACCGAAGTGCAGCTG  
*CTo3* AGTATCGGGCCGATTTTTGATAAAGAGAAAGAGCAGAACCGGCTGAAAGAAGTGCAGCTG  
*CTo4* AGTATCGGGCCGATTTTTGATAAAGAGAAAGAGCAGAACCGGCTGAAAGAAGTGCAGCTG

2872 I G E I G G Q A L D I A S T Q G K I I A  
*cdiA* ATTGGCGAGATAGGCGGTGAGGCGTTAGATATTGCCTCCACGCAGGGCAAGATAATTGCC  
*CTo2* ATTGGCGAGATAGGCGGTGAGGCGTTAGATATTGCCTCCACGCAGGGCAAGATAATTGCC  
*CTo3* ATTGGCGAGATAGGCGGTGAGGCGTTAGATATTGCCTCCACGCAGGGCAAGATAATTGCC  
*CTo4* ATTGGCGAGATAGGCGGTGAGGCGCTGGATATTGCCTCCACGCAGGGCAAGATAATTGCC

2892 T H A A N D K M K A V K P E D I A T A E  
*cdiA* ACTCACGCGGCAAACGACAAGATGAAGGCGGTGAAGCCGGAAGATATCGCCACGGCGGAA  
*CTo2* ACTCACGCGGCAAACGACAAGATGAAGGCGGTGAAGCCGGAAGATATCGCCACGGCGGAA  
*CTo3* ACTCACGCGGCAAACGACAAGATGAAGGCGGTGAAGCCGGAAGATATCGCCACGGCGGAA  
*CTo4* ACTCACGCGGCAAACGACAAGATGAAGGCGGTGAAGCCGGAAGATATCGCTCGCGGCGGAA

2912 K Q W E K A H P G K A A T A E D I N Q Q  
*cdiA* AAACAGTGGGAGAAAGCCATCCGGGCAAGGCGGCCACGGCAGAGGACATCAACCAGCAG  
*CTo2* AAACAGTGGGAGAAAGCCATCCGGGCAAGGCGGCCACGGCAGAGGACATCAACCAGCAG  
*CTo3* AAACAGTGGGAGAAAGCCATCCGGGCAAGGCGGCCACGGCAGAGGACATCAACCAGCAG  
*CTo4* AAACAGTGGGAGAAAGCCATCCGGGCAAGGCGGCCACGGCAGAGGACATCAACCAGCAG

2932 I Y Q T A Y N Q A F N D S G F G T G G P  
*cdiA* A T T T A C C A G A C G G C A T A T A A T C A G G C A T T T A A C G A C T C A G G A T T T G G G A C C G G C G G C C C G  
*CTo2* A T T T A C C A G A C G G C A T A T A A T C A G G C A T T T A A C G A G T C A G G A T T T G G G A C A G G C G G C C C G  
*CTo3* A T T T A C C A G A C G G C G T A T A A T C A G G C A T T T A A C G A C T C A G G A T T T G G G A C C G G C G G C C C G  
*CTo4* A T T T A C C A G A C G G C G T A T A A T C A G G C G T T T A A C G C G T C A G G A T T T G G G A C C G G C G G C C C G

2952 V Q R G M Q A A T A A V Q G L A G G N L  
*cdiA* G T G C A A C G C G G G A T G C A G G C G G C G A C A G C C G C C G T G C A G G G G C T G G C T G G C G G G A A T C T G  
*CTo2* G T G C A A C G C G G G T A T G C A G G C G G C G A C A G C C G C C G T G C A G G G G C T G G C C G G C G G G A A T A T G  
*CTo3* G T G C A A C G C G G G A T G C A G G C G G C G A C A G C C G C C G T G C A G G G G C T G G C C G G C G G G A A T C T G  
*CTo4* G T G C A A C G C G G G A T G C A G G C G G C G A C A G C C G C C G T G C A G G G G C T G G C C G G C G G G A A T A T G

2972 G A A L T G A S A P Y L A G V I K Q S T  
*cdiA* G G T G C G G C C C T G A C G G G T G C C A G T G C G C C G T A T C T A G C G G G G T G A T T A A G C A A A G T A C A  
*CTo2* G G T G C G G C C C T G A C G G G T G C C A G T G C G C C G T A T C T G C G G G G G T G A T T A A G C A A A G T A C A  
*CTo3* G G T G C G G C C C T G A C G G G T G C C A G T G C G C C G T A T C T G C G G G G G T G A T T A A G C A A A G T A C G  
*CTo4* G G T G C G G C C C T G A C G G G T G C C A G T G C G C C G T A T C T G C G G G G G T G A T T A A G C A A A G T A C G

2992 G D N P A A N T M A H A V L G A V T A Y  
*cdiA* G G C G A T A A T C C G G C G G C T A A C A C A A T G G C A C A C G C G G T A T T G G G C G C G G T G A C G G C C T A T  
*CTo2* G G C G A T A A T C C G G C G G C C A A C A C A A T G G C A C A C G C G G T A T T G G G C G C G G T G A C T G C C T A T  
*CTo3* G G C G A T A A T C C G G C G G C C A A C A C A A T G G C A C A C G C G G T A T T G G G C G C G G T G A C G G C C T A T  
*CTo4* G G C G A T A A T C C G G C G G C C A A C A C A A T G G C A C A C G C G G T A T T G G G C G C G G T G A C G G C C T A T

3012 A R G N N A L A G A A G A A T A E L M A  
*cdiA* G C C C G T G G C A A C A A T G C G C T G G C G G G T G C G G C G G G C G G C C A C G G C G G A G T T G A T G G C C  
*CTo2* G C C C G T G G C A A C C A T G C G C T G G C G G G T G C G G C T G G C G G C G G C C A C G G C G G A G T T G A T G G C C  
*CTo3* G C C A G C G G C A A C C A T G C G C T G G C G G G T G C G G C G G G C G G C C A C G G C G G A G T T G A T G G C C  
*CTo4* G C C A G C G G C A A C C A T G C G C T G G C G G G T G C G G C G G G C G G C C A C G G C G G A G T T G A T G G C C

3032 P T I I S A L G W D K N T L T E G Q K Q  
*cdiA* C C C A C G A T T A T C A G C G C G T G G G C T G G G A C A A G A A C A C A C T C A C C G A A G G T C A G A A A C A G  
*CTo2* C C C A C G A T T A T C A G C G C G T G G G C T G G G A C A A G A A C A C A C T C A C T G A A G G T C A G A A A C A G  
*CTo3* C C C A C G A T T A T C A G C G C G T G G G C T G G G A C A A G A A C A C A C T C A C C G A A G G T C A G A A A C A G  
*CTo4* C C C A C G A T T A T C A G C G C G T G G G C T G G G A C A A G A A C A C A C T C A C C G A A G G T C A G A A A C A G

3052 A V S A L S T L A A G L A G G L T G D S  
*cdiA* G C T G T C A G C G C A C T G A G T A C A T T A G C C G C C G G G C T G G C C G G T G G T T T G A C A G G T G A C A G C  
*CTo2* G C T G T C A G C G C A C T G A G T A C A T T A G C C G C C G G G C T G G C C G G T G G C C T G A C A T T G T G A C A G C  
*CTo3* G C T G T C A G C G C A C T G A G T A C A T T A G C C G C C G G G C T G G C C G G T G G T T T G A C A G G T G A C A G C  
*CTo4* G C T G T C A G C G C A C T G A G T A C A T T A G C C G C C G G G C T G G C C G G T G G T T T G A C A G G T G A C A G C

3072 T A D A I A G G Q A G K N A V E N N S L  
*cdiA* A C A G C G G A T G C G A T A G C C G G G G G C A G G C G G G G A A A A T G C G G T A G A G A A T A A C T C G C T G  
*CTo2* A C A G C G G A T G C G C T A G C C G G G G G C A G G C G G G G A A A A T G C G G T A G A G A A T A A C T T T T T A  
*CTo3* A C G C G G A T G C G C T A G C C G G G G G C A G G C G G G G A A A A T G C G G T A G A G A A T A A T T A T C T A  
*CTo4* A C G C G G A T G C G C T A G C C G G G G G C A G G C G G G G A A A A T G C G G T A G A G A A T A A C T C T C T G

3092 S G D K A R A A V Q E S K...  
*cdiA* A G C G G A G A C A A G G C G C G G G C A G C G G T T C A G G A A A G T A A A  
*CTo2* T C A C C A A C A A A A A A T G A A A G C T A A T G A A A G C A C T T G A T  
*CTo3* A A C C C A C T C A G G C A C T C A C C T T T G A T A A A G A A T T G T C A  
*CTo4* A C T G G A G A T C A A G C C C G C A G T C T G T T A A G C A G G T A C G
