# Supplementary material for: Identification of Functional Toxin/Immunity Genes Linked to Contact-Dependent Growth Inhibition (CDI) and Rearrangement Hotspot (Rhs) Systems
Source: PLoS Genet. 2011 Aug 4;7(8):e1002217. doi: 10.1371/journal.pgen.1002217 (PMC3150448; doi:10.1371/journal.pgen.1002217)
Supplement: Table S1 — Homologies between selected CdiA-CT and Rhs-CT sequences. Rhs-CT sequences were identified by BLAST searches using selected CdiA-CTs as the query sequences. The presence of probable rhs-CT/rhsI orphan modules is indicated for each Rhs system. (XLS) [file pgen.1002217.s009.xls]

## Sheet: Sheet1
Table S1. CdiA-CT and Rhs-CT homologiesa
CdiA-CT	Rhs-CTb	Sequence identity	Expect	rhs orphan regionc
Moraxella catarrhalis McGHS1(A5JFL2) [g-proteobacteria]	Erwinia amylovora CFBP1430 (D4HY66) [g-proteobacteria]	57/128 (44%)	3e-22	Yes
Yersinia pestis Microtus 91001 (Q74T84) [g-proteobacteria]	Waddlia chondrophila ATCC VR-1470 (D6YTT8) [Chlamydiae/Verrucomicrobia]	50/99 (50%)	2e-20	Yes
	Catenulispora acidiphila DSM 44928 (C7QAC6) [Actinobacteria]	32/78 (41%)	0.001	No
Escherichia coli A0 34/86 (Q1RPM1) [g-proteobacteria]	Pseudomonas fluorescens Pf0-1 (Q3KEM1) [g-proteobacteria]	39/112 (34%)	4e-08	No
	Yersinia pseudotuberculosis YPIII (B1JJQ7) [g-proteobacteria]	34/98 (34%)	9e-05	Yes
Photorhabdus asymbiotica ATCC 43949 (B6VNJ3) [g-proteobacteria]	Micromonospora sp. ATCC 39149 (C4RGD8) [Actinobacteria]	32/86 (37%)	0.0006	No
	Microscilla marina ATCC 23134 (A1ZK10) [Bacteroidetes]	34/90 (37%)	0.003	No
Dickeya zeae Ech1591 (C6CGV0) [g-proteobacteria]	Desulfatibacillum alkenivorans AK-01 (B8FA91) [d-proteobacteria]	60/113 (53%)	4e-27	Yes
Yersinia pestis CO-92 (Q0WE34) [g-proteobacteria]	Anaeromyxobacter sp. strain K (B4UEX6) [d-proteobacteria]	59/91 (64%)	3e-25	No
Yersinia pseudotuberculosis IP31758 (A7FGW9) [g-proteobacteria]	Pseudomonas entomophila L48 (Q1I6P2) [g-proteobacteria]	51/133 (38%)	4e-21	No
Pectobacterium wasabiae WPP163 (D0KF43) [g-proteobacteria]	Halothiobacillus neapolitanus ATCC 23641 (D0KZB0) g-proteobacteria]	48/111 (43%)	1e-12	No
	Waddlia chondrophila ATCC VR-1470 (D6YW71) [Chlamydiae/Verrucomicrobia]	36/102 (35%)	6e-06	No
Yersinia intermedia ATCC 29909 (C4T3V9) [g-proteobacteria]	Photorhabdus luminescens W14 (Q8GDM7) [g-proteobacteria]	75/124 (60%)	1e-37	No
aBLAST searches were conducted using CdiA-CT sequences (from VENN to the C-terminus) as the query. All Rhs and YD-repeat protein hits have at least 30% amino acid identity over 75 or more C-terminal residues. Uniprot numbers are give for each protein in parentheses.
bListed proteins are annotated as either Rhs or YD-repeat proteins, with the exception of Q1I6P2 from P. entomophila L48 .However, this protein is clearly related to several Rhs and YD-repeat proteins from Pseudomonas species.
cIndicates that the rhs locus is likely to also encode orphan rhs-CT/rhsI pairs (criteria used: following the rhs gene there is an ORF encoding a protein with a region related to Rhs sequence and a DPxGL motif followed by a short potential Immunity ORF). For those listed as "No", it is possible that orphan fragments are present but not obvious.
